# Supplementary material for: Molecular Evolution of Ultraspiracle Protein (USP/RXR) in Insects
Source: PubMed Central journal article supplement (PMC3162005; doi:10.1371/journal.pone.0023416), 2011-08-25

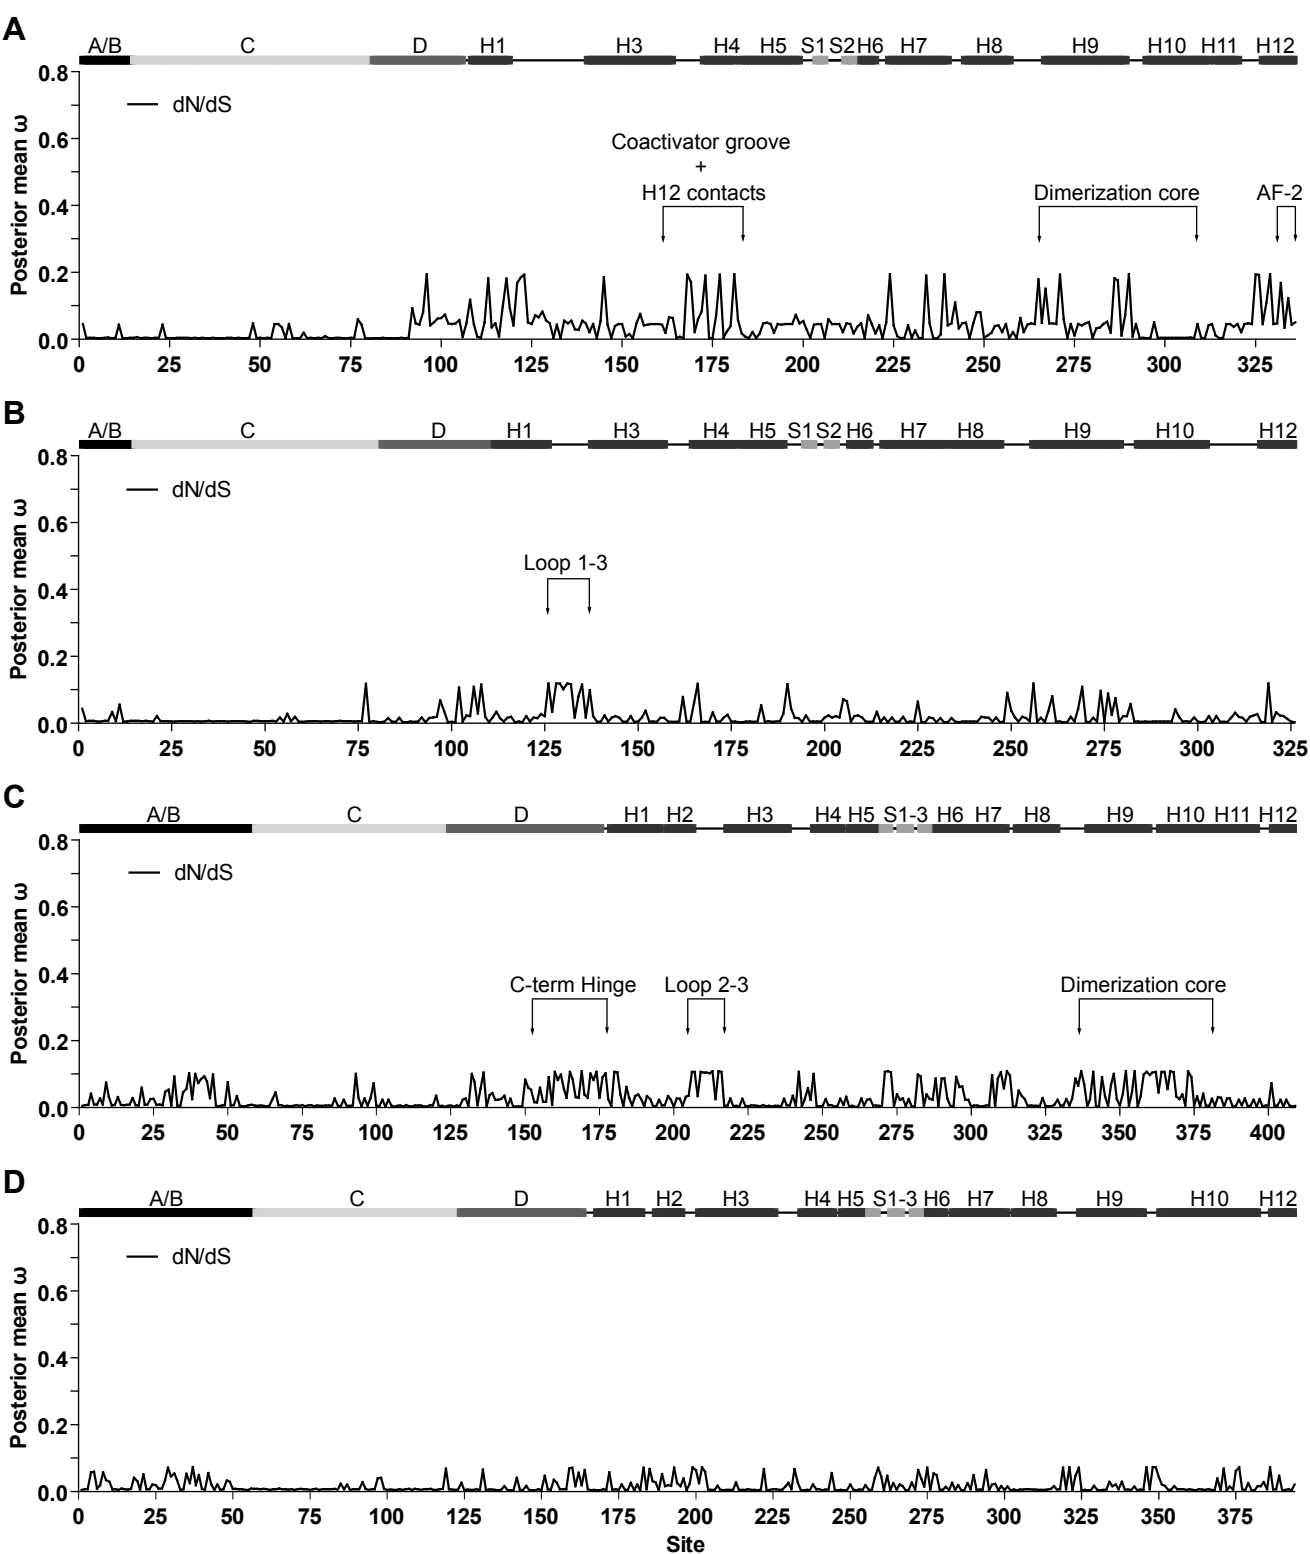

Supplement: pone.0023416.s004.pdf [file pone.0023416.s004.pdf]
